# Supplementary material for: Identification of microRNA-mRNA functional interactions in UVB-induced senescence of human diploid fibroblasts
Source: PubMed Central journal article supplement (PMC4008267; doi:10.1186/1471-2164-14-224), 2013-04-04

**A**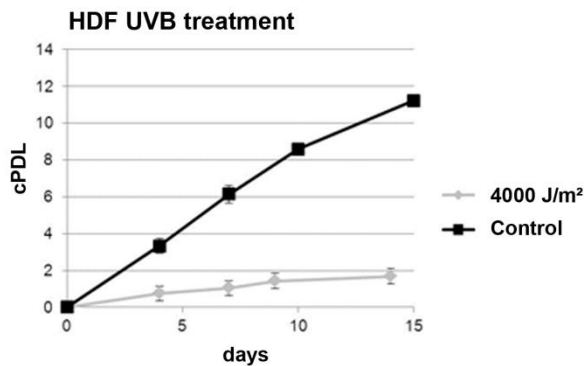**B**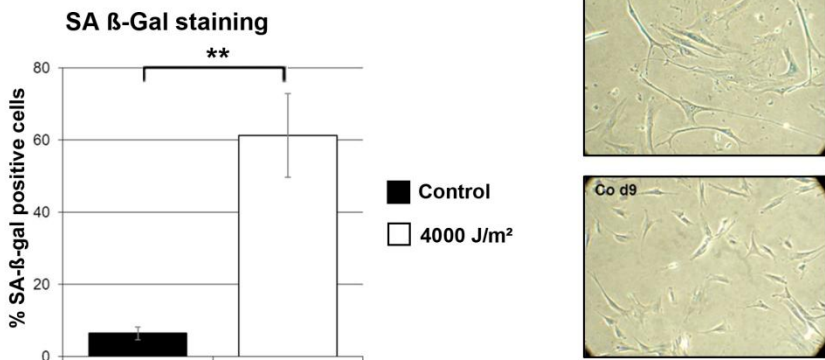**C**

### Protein expression in UVB induced senescence

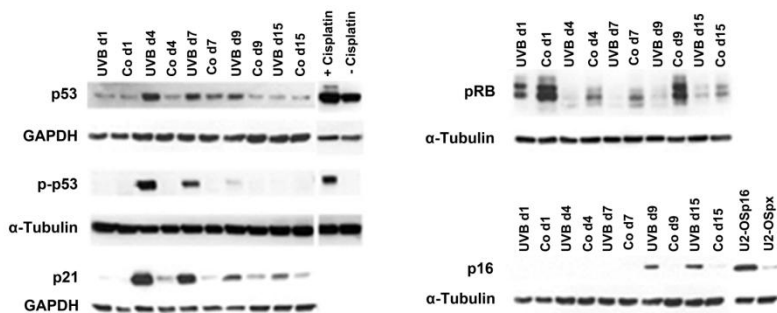

Supplement: 1471-2164-14-224-S1.pdf [file 1471-2164-14-224-S1.pdf]
