# Supplementary material for: Identification of microRNA-mRNA functional interactions in UVB-induced senescence of human diploid fibroblasts
Source: PubMed Central journal article supplement (PMC4008267; doi:10.1186/1471-2164-14-224), 2013-04-04

A

## HFF1 UVB treatment

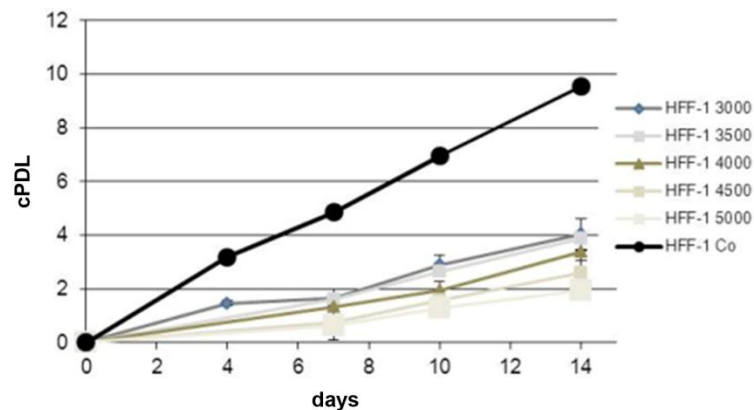

## PFF UVB treatment

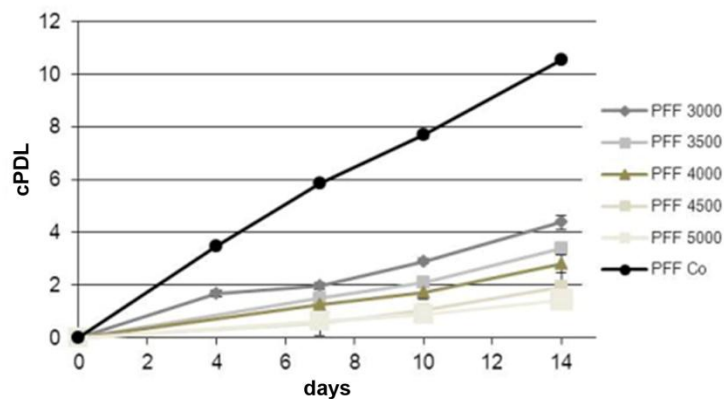

B

SA- $\beta$ -galactosidase (HFF-1)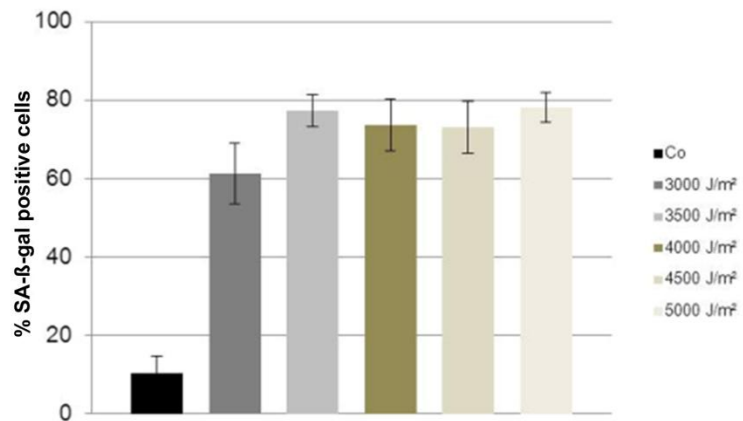SA- $\beta$ -galactosidase (PFF)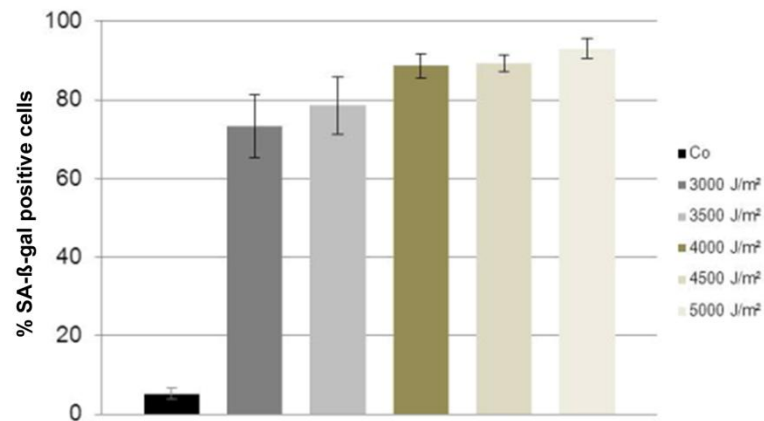

Supplement: 1471-2164-14-224-S2.pdf [file 1471-2164-14-224-S2.pdf]
