# Supplementary material for: Identification of microRNA-mRNA functional interactions in UVB-induced senescence of human diploid fibroblasts
Source: PubMed Central journal article supplement (PMC4008267; doi:10.1186/1471-2164-14-224), 2013-04-04

**A**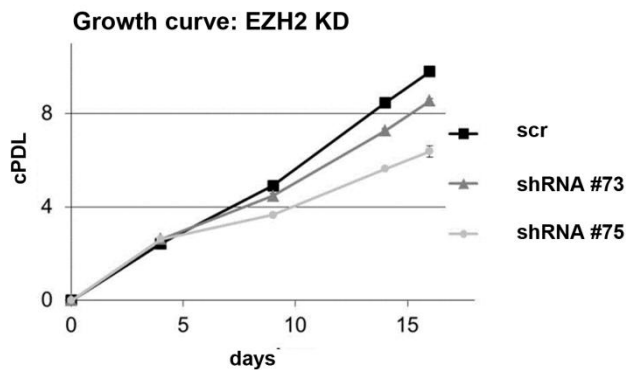

**EZH2 protein levels**

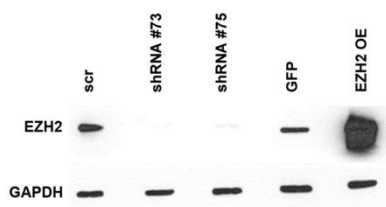**B**

**Senescence induction by EZH2 depletion**

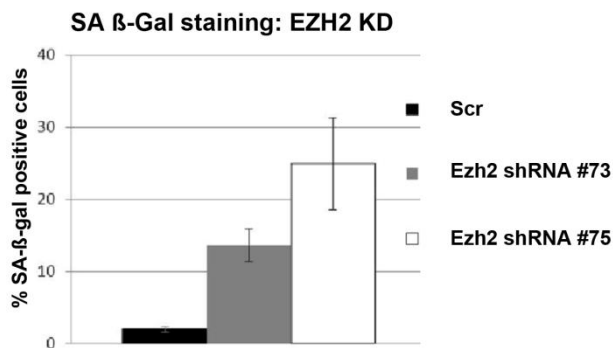

scr

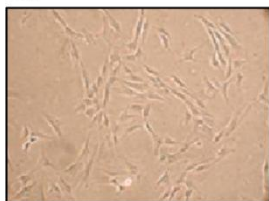

Ezh2 shRNA #73

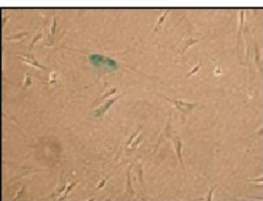

Ezh2 shRNA #75

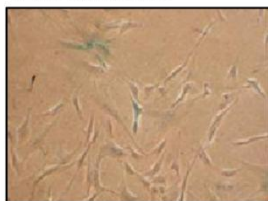

Supplement: 1471-2164-14-224-S7.pdf [file 1471-2164-14-224-S7.pdf]
