# Supplementary material for: Identification of microRNA-mRNA functional interactions in UVB-induced senescence of human diploid fibroblasts
Source: PubMed Central journal article supplement (PMC4008267; doi:10.1186/1471-2164-14-224), 2013-04-04

### EZH2 expression levels after OE (virus)

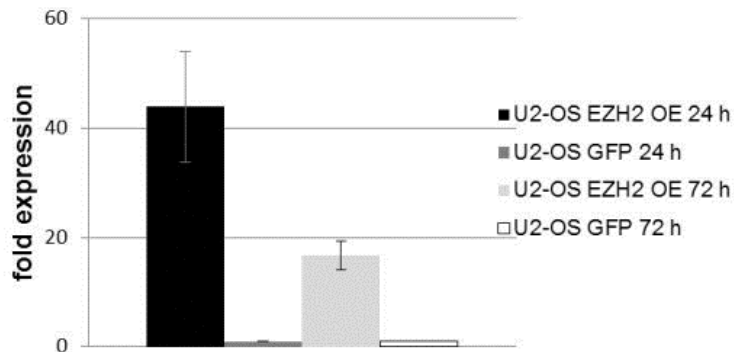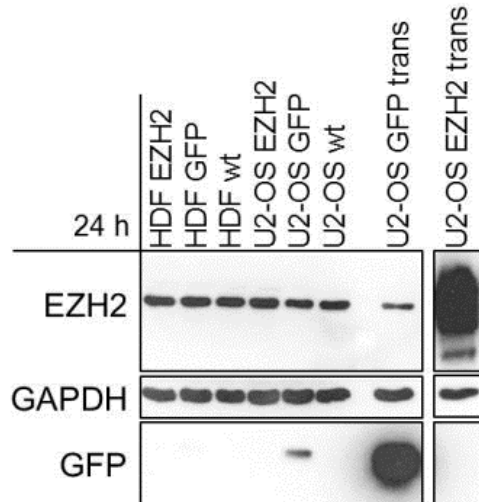

### EZH2 expression levels after OE (virus)

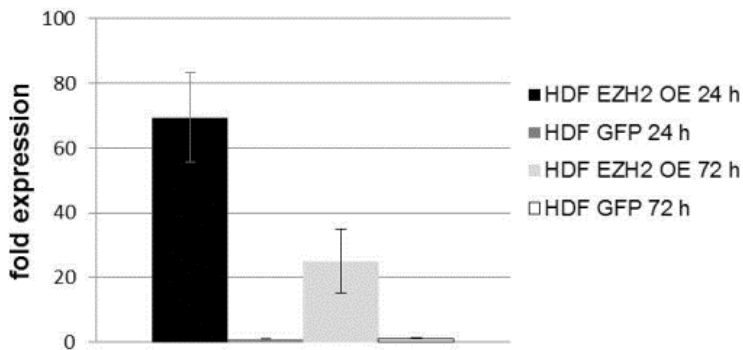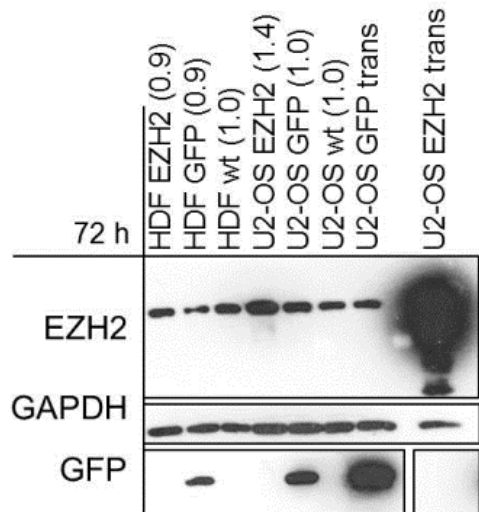

Supplement: 1471-2164-14-224-S8.pdf [file 1471-2164-14-224-S8.pdf]
